# Supplementary material for: Click-Chemistry Cross-Linking of Hyaluronan Graft Copolymers
Source: MDPI journal article supplement (doi:10.3390/pharmaceutics14051041), 2022-05-11
Supplement: s1 [file s1]

## Electronic Supplementary Materials for

# Click-Chemistry Cross-Linking of Hyaluronan Graft Copolymers

Mario Saletti <sup>1</sup>, Marco Paolino <sup>1,\*</sup>, Lavinia Ballerini <sup>1</sup>, Germano Giuliani <sup>1</sup>, Gemma Leone <sup>1</sup>, Stefania Lamponi <sup>1</sup>, Marco Andreassi <sup>1</sup>, Claudia Bonechi <sup>1</sup>, Alessandro Donati <sup>1</sup>, Daniele Piovani <sup>2</sup>, Alberto Giacometti Schieron <sup>2</sup>, Agnese Magnani <sup>1</sup> and Andrea Cappelli <sup>1,\*</sup>

- <sup>1</sup> Dipartimento di Biotecnologie, Chimica e Farmacia (Dipartimento di Eccellenza 2018–2022), Università degli Studi di Siena, Via Aldo Moro 2, 53100 Siena, Italy; mario.saletti@student.unisi.it (M.S.); lavinia.ballerini@student.unisi.it (L.B.); giuliani5@unisi.it (G.G.); gemma.leone@unisi.it (G.L.); stefania.lamponi@unisi.it (S.L.); marco.andreassi@unisi.it (M.A.); claudia.bonechi@unisi.it (C.B.); alessandro.donati@unisi.it (A.D.); agnese.magnani@unisi.it (A.M.)
- <sup>2</sup> Istituto di Scienze e Tecnologie Chimiche “G. Natta”-SCITEC (CNR), Via A. Corti 12, 20133 Milano, Italy; piovani@ismac.cnr.it (D.P.); alberto.giacometti@scitec.cnr.it (A.G.S.)
- \* Correspondence: paolino3@unisi.it (M.P.); andrea.cappelli@unisi.it (A.C.); Tel.: +39-0577-234320 (A.C.)

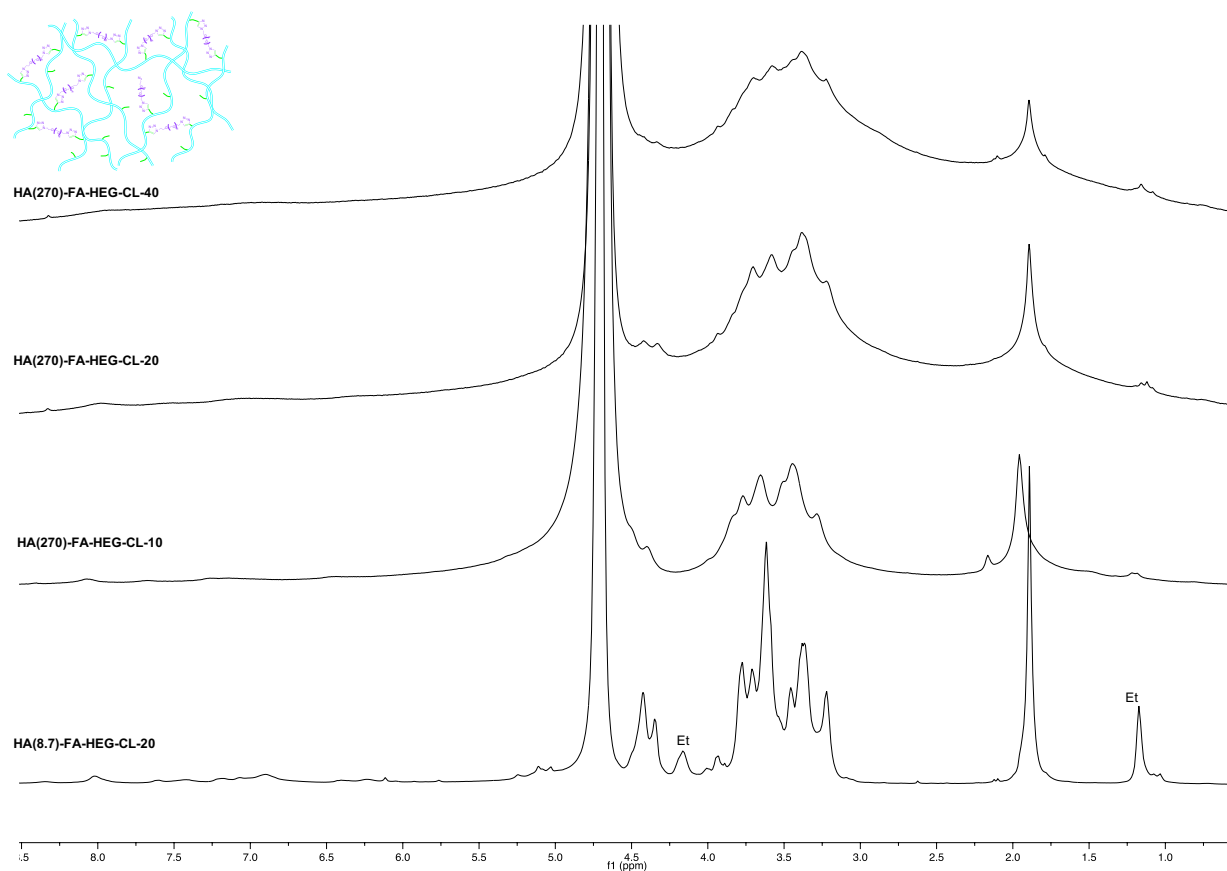

**Figure S1.** Comparison <sup>1</sup>H NMR spectra (D<sub>2</sub>O, 600 MHz) obtained with the cross-linked materials **HA(8.7)-FA-HEG-CL-20**, **HA(270)-FA-HEG-CL-10**, **HA(270)-FA-HEG-CL-20**, **HA(270)-FA-HEG-CL-40**. In the

spectrum of **HA(8.7)-FA-HEG-CL-20**, “Et” labels indicate the signals of ethyl groups of the monomeric units with esterified carboxylic groups.

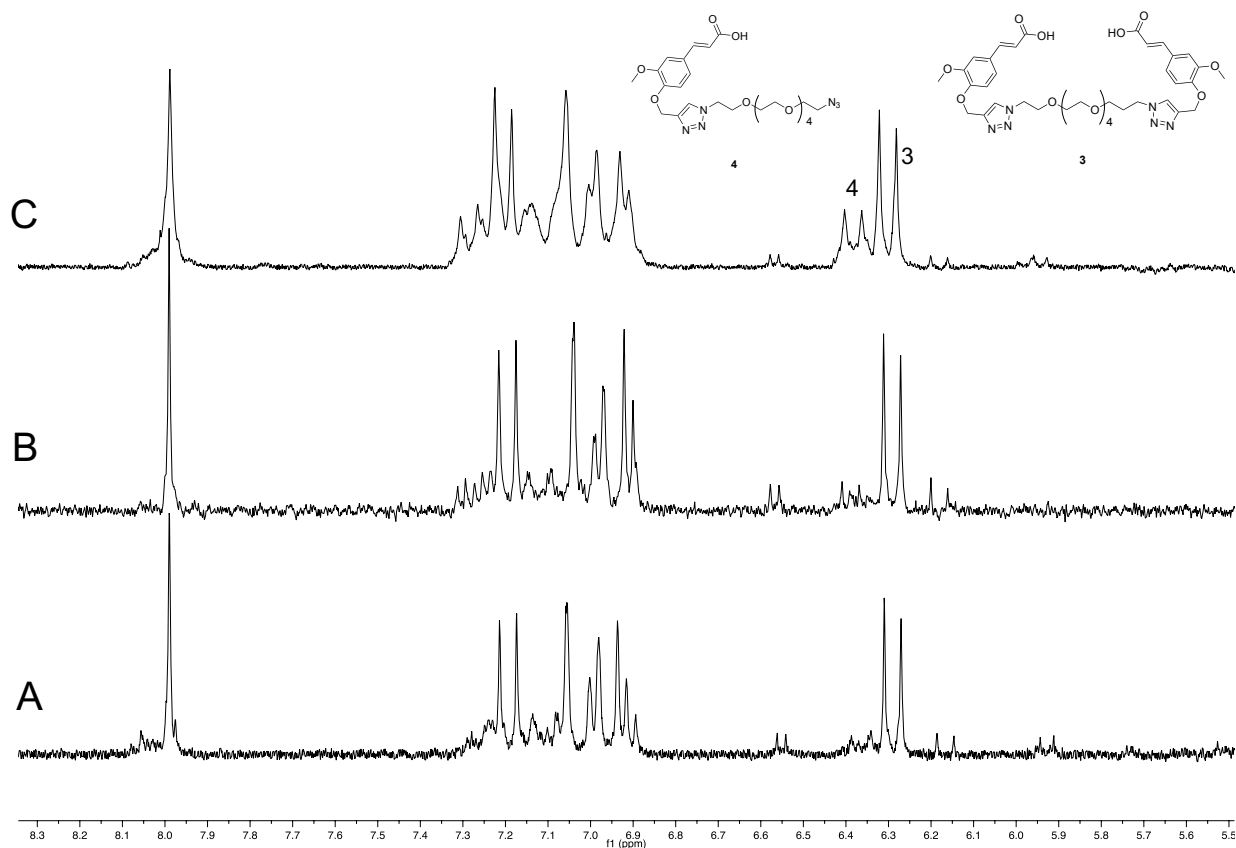

**Figure S2.** Comparison of the aromatic regions of  $^1\text{H}$  NMR spectra ( $\text{D}_2\text{O}$ , 400 MHz) obtained with the cross-linked materials **HA(270)-FA-HEG-CL-10** (trace A), **HA(270)-FA-HEG-CL-20** (trace B), **HA(270)-FA-HEG-CL-40** (trace C) after hydrolysis with NaOD at room temperature for 10 min.

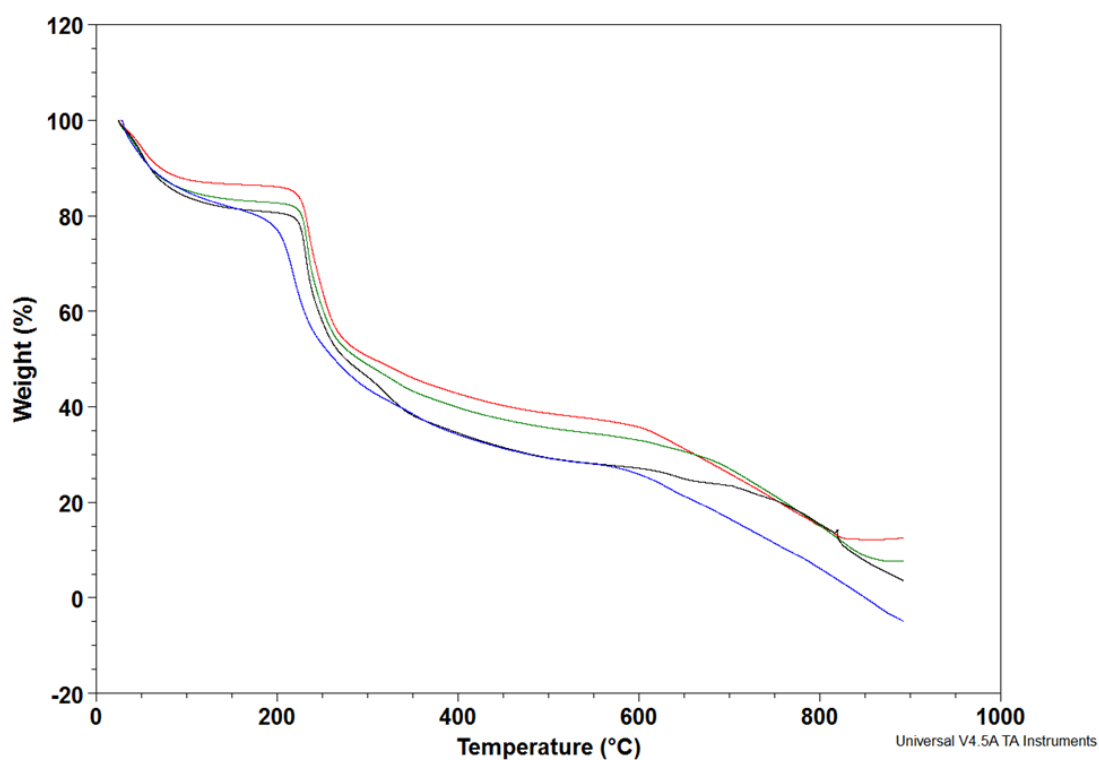

**Figure S3.** Thermographs of the hydrogels obtained with **HA(270)-FA-HEG-CL-20** (green), **HA(270)-FA-HEG-CL-40** (black), **HA(270)-FA-HEG-CL-10** (red), **HA(8.7)-FA-HEG-CL-20** (blue).

**Table S1.** Viscosity values of 1% w/v solutions at different shear rate ( $\gamma$ ) values of **HA(270)-FA-Pg** and **HA(8.7)-FA-Pg-20** graft copolymers. Zero-shear viscosity ( $\eta_0$ ) obtained applying Cross Model.

| Sample                  | $\eta$<br>( $\gamma = 0.01 \text{ s}^{-1}$ ) | $\eta$<br>( $\gamma = 0.01 \text{ s}^{-1}$ ) | $\eta_0$       | $R^2$ |
|-------------------------|----------------------------------------------|----------------------------------------------|----------------|-------|
| <b>HA(270)-FA-Pg-10</b> | $4.6 \pm 0.9$                                | $7.8 \pm 0.4 \cdot 10^{-3}$                  | $6.6 \pm 0.3$  | 1     |
| <b>HA(270)-FA-Pg-20</b> | $2.0 \pm 1.0$                                | $1.2 \pm 0.3 \cdot 10^{-2}$                  | $2.9 \pm 0.8$  | 1     |
| <b>HA(270)-FA-Pg-40</b> | $8.8 \pm 0.4$                                | $2.3 \pm 0.4 \cdot 10^{-2}$                  | $26.9 \pm 0.8$ | 1     |
| <b>HA(8.7)-FA-Pg-20</b> | $3.1 \pm 0.2$                                | $6.4 \pm 0.2 \cdot 10^{-4}$                  | $1.4 \pm 0.2$  | 0.97  |
